# Supplementary material
Source: PubMed Central journal article supplement (PMC9033212)
Supplement: mmc1.pdf [file mmc1.pdf]

# THE LANCET

## Infectious Diseases

### Supplementary appendix

This appendix formed part of the original submission and has been peer reviewed. We post it as supplied by the authors.

Supplement to: Bager P, Wohlfahrt J, Bhatt S, et al. Risk of hospitalisation associated with infection with SARS-CoV-2 omicron variant versus delta variant in Denmark: an observational cohort study. *Lancet Infect Dis* 2022; published online April 22. [https://doi.org/10.1016/S1473-3099\(22\)00154-2](https://doi.org/10.1016/S1473-3099(22)00154-2).

## APPENDIX

### Additional authors (“Omicron-Delta study group”):

Sofie Marie Edslev<sup>1</sup>, MSc, Raphael Niklaus Sieber<sup>1</sup>, PhD, Anna Cécilia Ingham<sup>1</sup>, PhD, Maria Overvad<sup>2</sup>, PhD, Mie Agermose Gram<sup>2</sup>, MScPH, Frederikke Kristensen Lomholt<sup>2</sup>, MD, Louise Hallundbæk<sup>2</sup>, MScPH, Caroline Hjorth Espensen<sup>2</sup>, MD, Sophie Gubbels<sup>3</sup>, PhD, Marianne Karakis<sup>3</sup>, MEd, Karina Lauenborg Møller<sup>3</sup>, PhD, Stefan Schytte Olsen<sup>3</sup>, Zitta Barrella Harboe<sup>4,5,6</sup>, PhD, Caroline Klint Johannesen<sup>7,8</sup>, MScPH, Maarten van Wijhe<sup>9</sup>, PhD, Jon Gitz Holler<sup>4,29</sup>, PhD, Ram Benny Christian Dessau<sup>10,11</sup>, PhD, Martin Barfred Friis<sup>20</sup>, PhD, David Fuglsang-Damgaard<sup>13</sup>, MD, Mette Pinholt<sup>14</sup>, PhD, Thomas Vognbjerg Sydenham<sup>15</sup>, PhD, John Eugenio Coia<sup>16, 11</sup>, MD, Ea Sofie Marmolin<sup>17</sup>, MD, Anders Fomsgaard<sup>7</sup>, Prof, Jannik Fonager<sup>7</sup>, PhD, Morten Rasmussen<sup>7</sup>, PhD, Arie Cohen<sup>18</sup>, PhD.

### Affiliations:

<sup>1</sup>Dept of Bacteria, Parasites, and Fungi, Statens Serum Institut, Copenhagen, Denmark (DK).

<sup>2</sup>Infectious Disease Epidemiology & Prevention, Statens Serum Institut, Copenhagen, DK

<sup>3</sup>Division of Infectious Disease Preparedness, Statens Serum Institut, Copenhagen, DK

<sup>4</sup>Dept of Respiratory Medicine and Infectious Diseases, Copenhagen University Hospital, North Zealand, DK

<sup>5</sup>Dept of Clinical Medicine, Faculty of Health Science, University of Copenhagen, DK

<sup>6</sup>Dept of Infectious Diseases, Rigshospitalet, Copenhagen University Hospital, Copenhagen, DK

<sup>7</sup>Dept of Virus & Microbiological Special Diagnostics, Statens Serum Institut, Copenhagen, DK

<sup>8</sup>Dept of Clinical Research, Nordsjaellands Hospital, Hillerød, DK

<sup>9</sup>PandemiX Center, Dept of Science and Environment, Roskilde University, DK

<sup>10</sup>Dept of Clinical Microbiology, Zealand University Hospital, Slagelse, DK

<sup>11</sup>Dept of Regional Health Research, University of Southern DK

<sup>12</sup>Dept of Clinical Microbiology, Herlev and Gentofte Hospital, Herlev, DK

<sup>13</sup> Dept of Clinical Microbiology, Aalborg University Hospital, Aalborg, DK

<sup>14</sup> Dept of Clinical Microbiology, Vejle Hospital, Vejle, DK

<sup>15</sup> Dept of Clinical Microbiology, Odense University Hospital, Odense, DK

<sup>16</sup> Dept of Clinical Microbiology, Southwest Jutland Hospital, Esbjerg, DK

<sup>17</sup> Dept of Clinical Microbiology, Copenhagen University Hospital – Amager and Hvidovre, DK

<sup>18</sup> Test Center Danmark, Statens Serum Institut, Copenhagen, DK

**Figure S1.** Flow chart for inclusion of the study population of 188,980 SARS-CoV-2 RT-PCR positive individuals between 21 November and 19 December 2021, Denmark.

| Inclusion criteria                                                             | Flow | SARS-CoV-2 cases | Omicron cases | Delta cases       | Omicron hosp. | Delta hosp.  | Excluded cases | Excluded hosp. | Exclusion reason                                 |
|--------------------------------------------------------------------------------|------|------------------|---------------|-------------------|---------------|--------------|----------------|----------------|--------------------------------------------------|
| SSI SARS-CoV-2 Surveillance database Linelist sampledates 21.11. to 19.12.2021 | ↓    | 192610           | 38817         | 153793            | 222           | 2279         |                |                |                                                  |
| Positive Omicron vPCR, or negative or not reported                             | ↓    | 189888           | 38817         | 151071            | 222           | 2238         | → 2722         | 41             | Omicron vPCR inconclusive due to high Cycle time |
| Follow-up >=14 dage                                                            | ↓    | 189888           | 38817         | 151071            | 222           | 2238         | → 0            | 0              | Follow-up <14 days                               |
| Information on name of region                                                  | ↓    | <b>188980</b>    | 38669         | 150311*           | 222           | 2213*        | → 908          | 25             | Missing name of region                           |
| Healthcare track                                                               |      | 15877            | 2765          | 2925 neg, 10187   | 103           | 274 neg, 806 | → 343          | 21             |                                                  |
| Community track                                                                |      | 173103           | 35904         | 119724 neg, 17475 | 119           | 997 neg, 136 | → 565          | 4              |                                                  |

\*Delta was defined by either negative (neg.) or not reported Omicron vPCR result (no data in the surveillance system), respectively.

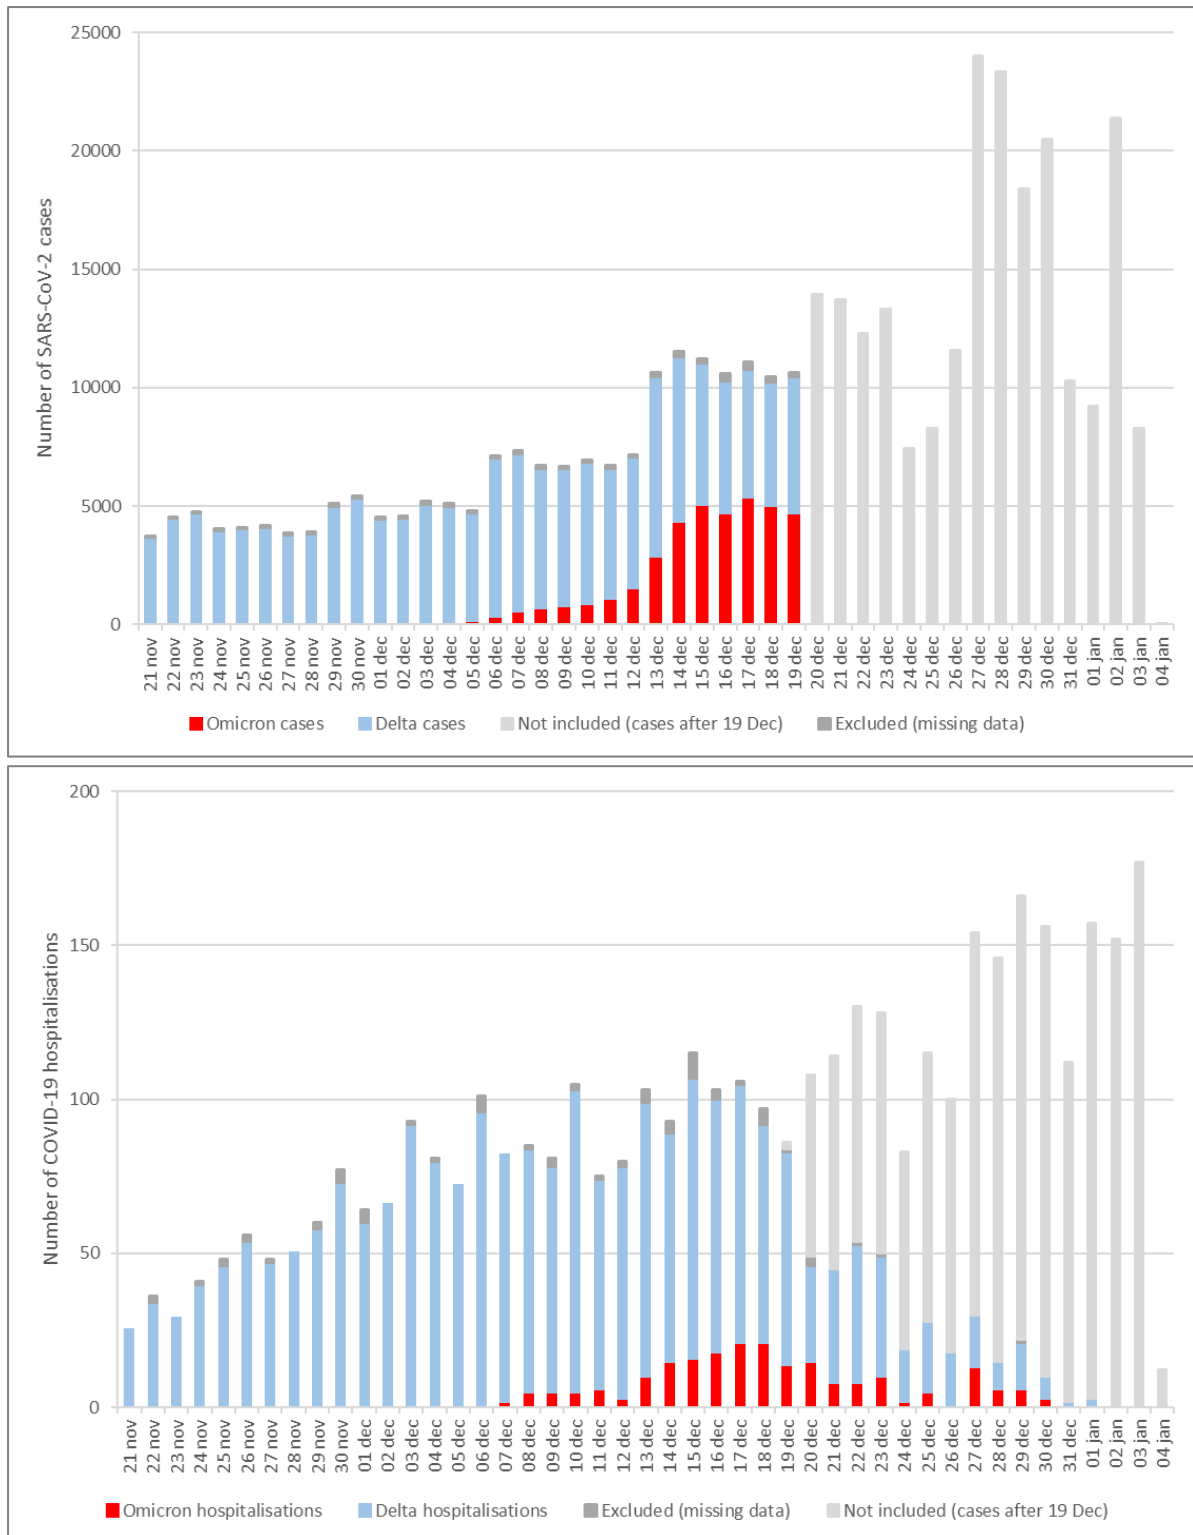

**Figure S2.** Timeline for cases of infection (test/sample dates, top figure) and COVID-19 hospitalisations (admission dates, bottom figure) by variant in the study population of 188,980 cases of RT-PCR confirmed SARS-CoV-2 infections, between 21 November and 19 December 2021, Denmark. Note that the decrease in number of studied hospitalisations (blue and red bars) after 19 December is by design due to the inclusion of cases until that date. In addition, the apparent increase in number of hospitalisations between 21 November and 19 December is partly due to fact that cases before 21 November were not included in the study, and their associated COVID-19 hospitalisations from 21 November and onwards therefore are not shown in the figure. All studied COVID-19 hospitalisations were followed up for diagnoses and discharge data in the National Patient Registry until 2 February 2022.

**Table S1.** Further stratification of characteristics of 188,980 cases of RT-PCR confirmed SARS-CoV-2 infections between 21 November and 19 December 2021, Denmark.

|                                                                 | SARS-CoV-2 variant   |                     |                      |                    |                     |                   | COVID-19 hospitalisation |                   |                           |                       |  |
|-----------------------------------------------------------------|----------------------|---------------------|----------------------|--------------------|---------------------|-------------------|--------------------------|-------------------|---------------------------|-----------------------|--|
|                                                                 | Overall              |                     | <30 years            |                    | Reinfected          |                   | Overall                  |                   | Length of stay in hours** |                       |  |
|                                                                 | Omicron<br>(N=38669) | Delta<br>(N=150311) | Omicron<br>(N=20088) | Delta<br>(N=72437) | Omicron<br>(N=2142) | Delta<br>(N=1886) | Omicron<br>(N=222)       | Delta<br>(N=2213) | Omicron<br>median (IQR)   | Delta<br>median (IQR) |  |
| <b>Vaccination against SARS-CoV-2</b><br>(status at infection*) |                      |                     |                      |                    |                     |                   |                          |                   |                           |                       |  |
| <b>None or only one dose</b>                                    | 7266 (18.8)          | 69885 (46.5)        | 5613 (27.9)          | 54706 (75.5)       | 622 (29.0)          | 1103 (58.5)       | 54 (24.3)                | 997 (45.1)        | 19 (6-41)                 | 28 (9-121)            |  |
| Infected and not vaccinated                                     | 5322 (13.8)          | 59345 (39.5)        | 4128 (20.5)          | 46577 (64.3)       | 496 (23.2)          | 978 (51.9)        | 43 (19.4)                | 907 (41.0)        | 19 (6-51)                 | 28 (9-121)            |  |
| Infected before D1                                              | 28 (.1)              | 1964 (1.3)          | 27 (.1)              | 1904 (2.6)         | 4 (.2)              | 24 (1.3)          | 0 (.0)                   | 7 (.3)            | -                         | 15 (4-34)             |  |
| Infected 0-13 days after D1                                     | 885 (2.3)            | 5250 (3.5)          | 820 (4.1)            | 4638 (6.4)         | 33 (1.5)            | 53 (2.8)          | 4 (1.8)                  | 24 (1.1)          | 16 (7-23)                 | 67 (8-177)            |  |
| Infected 14+ days after D1                                      | 826 (2.1)            | 2800 (1.9)          | 501 (2.5)            | 1348 (1.9)         | 70 (3.3)            | 39 (2.1)          | 4 (1.8)                  | 51 (2.3)          | 39 (28-81)                | 20 (12-117)           |  |
| Infected 0-13 days after D2                                     | 205 (.5)             | 526 (.3)            | 137 (.7)             | 239 (.3)           | 19 (.9)             | 9 (.5)            | 3 (1.4)                  | 8 (.4)            | 6 (4-10)                  | 58 (5-148)            |  |
| <b>Two doses</b>                                                | 29922 (77.4)         | 77441 (51.5)        | 14111 (70.2)         | 17501 (24.2)       | 1460 (68.2)         | 720 (38.2)        | 145 (65.3)               | 1041 (47.0)       | 12 (6-41)                 | 45 (12-124)           |  |
| Infected 14+ days after D2                                      | 29776 (77.0)         | 77088 (51.3)        | 14103 (70.2)         | 17496 (24.2)       | 1457 (68.0)         | 714 (37.9)        | 143 (64.4)               | 1029 (46.5)       | 12 (6-43)                 | 45 (12-124)           |  |
| Infected 0-13 days after D3                                     | 146 (.4)             | 353 (.2)            | 8 (.0)               | 5 (.0)             | 3 (.1)              | 6 (.3)            | 2 (.9)                   | 12 (.5)           | 14 (3-24)                 | 112 (18-208)          |  |
| <b>Three doses</b>                                              |                      |                     |                      |                    |                     |                   |                          |                   |                           |                       |  |
| Infected 14+ days after D3                                      | 1481 (3.8)           | 2985 (2.0)          | 364 (1.8)            | 230 (.3)           | 60 (2.8)            | 63 (3.3)          | 23 (10.4)                | 175 (7.9)         | 25 (7-100)                | 74 (19-143)           |  |

Data are n (%), unless otherwise specified. D1, dose 1; D2, dose 2; D3, dose 3. \*Time of infection defined as the RT-PCR positive sample date. \*\* Not comparable to true length of stays because of truncation until 2 February and inclusion of snapshot data with some stays <12 hours. Nevertheless the data is shown here as a relative comparison by variant. The true length of stay is published by the Danish Health Authority (DHA) based on complete data from the National Patient Registry and does not rely on snapshot data that may include stays <12 hours. For example, the DHA reported a median length of stay of 3.7 days for COVID-hospitalisations of >12hours in September 2021, and 2.6 days for 30-39 year-olds from July to September 2021, both periods where the Delta variant dominated. In comparison, length of stay for 30-39 year-olds in the study population when excluding stays <12 hour, was 45 hours (IQR 20-108) for Delta hospitalisations, which is 1.9 days and thus 2.6-1.9=0.7 days lower than the length reported by DHA.

**Table S2.** Risk ratio of hospitalisation by infection with SARS-CoV-2 variant Omicron compared to Delta, overall and according to vaccination status, with reduced adjustment compared with main analysis, among 188,980 cases between 21 November and 19 December 2021, Denmark.

|                                       | Omicron COVID-19 hospitalisations (n) and COVID-19 hospitalisation RR (95%CI) |         |                       |                  |                  |         |
|---------------------------------------|-------------------------------------------------------------------------------|---------|-----------------------|------------------|------------------|---------|
|                                       | Main estimate                                                                 | P value | By vaccination status |                  |                  |         |
|                                       |                                                                               |         | None or only one dose | Two doses        | Three doses      | P value |
| Main crude estimates (see Table 2)    | 0.39 (0.34,0.45)                                                              | <.0001  | 0.52 (0.40,0.68)      | 0.36 (0.30,0.43) | 0.26 (0.17,0.41) | 0.02    |
| Main adjusted estimates (see Table 2) | 0.64 (0.56,0.75)                                                              | <.0001  | 0.57 (0.44,0.75)      | 0.71 (0.60,0.86) | 0.50 (0.32,0.76) | 0.15    |
| Not adjusted for age                  | 0.50 (0.43,0.58)                                                              | <.0001  | 0.61 (0.47,0.81)      | 0.49 (0.41,0.59) | 0.39 (0.25,0.59) | 0.17    |
| Not adjusted for period               | 0.60 (0.52,0.69)                                                              | <.0001  | 0.54 (0.41,0.70)      | 0.66 (0.56,0.79) | 0.47 (0.31,0.72) | 0.18    |
| Not adjusted for sex                  | 0.64 (0.56,0.75)                                                              | <.0001  | 0.57 (0.44,0.75)      | 0.71 (0.60,0.86) | 0.50 (0.32,0.76) | 0.15    |
| Not adjusted for comorbidities        | 0.62 (0.53,0.71)                                                              | <.0001  | 0.54 (0.41,0.72)      | 0.68 (0.57,0.82) | 0.48 (0.31,0.74) | 0.15    |
| Not adjusted for region               | 0.65 (0.56,0.75)                                                              | <.0001  | 0.58 (0.44,0.76)      | 0.72 (0.60,0.86) | 0.48 (0.32,0.74) | 0.12    |
| Not adjusted for reinfection status   | 0.64 (0.56,0.75)                                                              | <.0001  | 0.57 (0.44,0.75)      | 0.71 (0.60,0.86) | 0.50 (0.32,0.76) | 0.15    |

**Table S3.** Risk ratio of hospitalisation by infection with SARS-CoV-2 variant Omicron compared to Delta using alternative exclusion criterias, adjustments, regression method, and stratification among 188,980 cases between 21 November and 19 December 2021, Denmark.

| Alternative exclusion criterias, adjustments, regression method, and stratification | Adjusted COVID-19 hospitalisation RR (95%CI) |                    |
|-------------------------------------------------------------------------------------|----------------------------------------------|--------------------|
|                                                                                     | Omicron hosp.                                | Main estimate      |
| Main estimate (see Table 2)                                                         | 222                                          | 0.64 (0.56,0.75)   |
| <b>Alternative exclusion criteria</b>                                               |                                              |                    |
| Excluding AZ or JJ vaccinated cases (1.9%)                                          | 222                                          | 0.64 (0.55,0.74)   |
| Excluding non-COVID-19 diagnosis, and stays with no data on diagnoses (1%)*         | 127                                          | 0.55 (0.45,0.66)   |
| Excluding stays <=12h, and stays with no data on diagnoses (1%)*                    | 122                                          | 0.54 (0.44,0.65)   |
| Excluding reinfected cases                                                          | 211                                          | 0.65 (0.56,0.76)   |
| Excluding early half of cases (14 days: 21 Nov to 4 Dec)                            | 220                                          | 0.65 (0.56,0.75)   |
| <b>Alternative adjustments</b>                                                      |                                              |                    |
| Adjusted for ethnicity                                                              | 222                                          | 0.66 (0.57,0.76)   |
| Adjusted for age in 5-year groups                                                   | 222                                          | 0.64 (0.55,0.74)   |
| Adjusted for age as a continuous variable                                           | 222                                          | 0.66 (0.57,0.76)   |
| Adjusted for age and age (continuous) X vaccination                                 | 222                                          | 0.64 (0.55,0.74)   |
| Alternativ regression method (logistic regression)                                  | 222                                          | 0.64 (0.55,0.74)   |
| <b>Alternative stratifications</b>                                                  |                                              |                    |
| Stratified by age (years) and comorbidity                                           |                                              | <i>p=0.33</i>      |
| 0-59y, comorbidity no                                                               | 122                                          | 0.55 (0.45,0.67)   |
| 0-59y, comorbidity yes                                                              | 46                                           | 0.48 (0.35,0.65)   |
| 60+y, comorbidity no                                                                | 15                                           | 0.35 (0.21,0.59)   |
| 60+y, comorbidity yes                                                               | 39                                           | 0.49 (0.36,0.68)   |
| Stratified by age, years                                                            |                                              | <i>p=0.0025</i>    |
| 0-19                                                                                | 31                                           | **1.59 (1.09,2.32) |
| 20-39                                                                               | 83                                           | 0.74 (0.59,0.95)   |
| 40-59                                                                               | 54                                           | 0.54 (0.41,0.72)   |
| 60+                                                                                 | 54                                           | 0.48 (0.36,0.63)   |
| Stratified by reinfection status                                                    |                                              | <i>p=0.34</i>      |
| Not reinfection                                                                     | 211                                          | 0.51 (0.44,0.59)   |
| Yes reinfection                                                                     | 11                                           | 0.37 (0.19,0.73)   |

\*See Methods. Data on diagnoses and length of stay was truncated on 2 February 2022 by data from the National Patient Registry.

\*\* Removing all individuals 0-2 years of age, stays <12hours, and not yet validated stays (ie had no information on length stay), the RR was 1.41 (0.75,2.66). Stratifying the RR 1.59 for 0-19 year-olds further by age the RRs were 1.18 for 0-2y, 0.90 for 3-11y, 2.48 for 12-15y, and 1.26 for 16-19y.

### **Sensitivity analyses with Table S3**

In sensitivity analyses shown in Table S3, we stratified the Omicron RR of hospitalisation by ages above and below 60 years and by comorbidity status in each group and observed no difference in the main effect between the groups. In a further analysis, we used the script algorithm (see Methods section) on 2,416 patients (99%) with information from the National Patient Registry truncated on 2 February 2022, and identified 1,767 patients admitted because of COVID-19 diagnoses, 79 admitted because of respiratory or observational diagnoses, and 570 admitted because of other diagnoses (truncated length of stay was available for all 2,416 patients). Restricting hospitalization to those with COVID-19 diagnoses did not alter the RRs substantially (Table S3). The Omicron RR of hospitalisation were also not altered substantially by excluding the small proportion of cases vaccinated with the Vaxzevria or Johnson & Johnson vaccine, cases in the first half of the study period when Omicron had none or little community spread, when excluding reinfected cases, or when stratifying by reinfection status. Among unvaccinated with and without reinfection there was also no substantially different RR compared with the main estimate (with reinfection: RR 0.80 (95%CI 0.31-2.03), 6 Omicron hospitalisations; without reinfection: RR 0.57, 95%CI 0.43-0.76, 48 Omicron hospitalisations) (all data not shown). Finally, further adjustment of the RR of hospitalisation of Omicron for ethnicity did not affect the RR substantially (Table S3).
